# Supplementary material
Source: PubMed Central journal article supplement (PMC1891259)
Supplement: pnas_0703806104_3.pdf [file pnas_0703806104_3.pdf]

**Table 3**  
**Characteristics of Subjects**

|       | <b>DX</b>      | <b>AGE</b>  | <b>PMI</b>  | <b>R/L</b> | <b>M/F</b> | <b>pH</b>   | <b>18/28S</b> | <b>%PC</b>  | <b>Cause of Death</b>  | <b>Psychotropic Medications</b>                             |
|-------|----------------|-------------|-------------|------------|------------|-------------|---------------|-------------|------------------------|-------------------------------------------------------------|
| 1     | C              | 36          | 20          | Lt         | M          | 5.97        | 0.9           | 20.5        | Myocardial Infarct     |                                                             |
| 2     | C              | 66          | 7.4         | Rt         | F          | 6.03        | 0.6           | 31.7        | Cancer                 |                                                             |
| 3     | C              | 54          | 24.2        | Lt         | M          | 6.53        | 1.8           | 37.9        | Cardiac Arrest         |                                                             |
| 4     | C              | 69          | 15.3        | Rt         | M          | 6.88        | 1.5           | 34.3        | Respiratory Failure    |                                                             |
| 5     | C              | 70          | 15          | Rt         | F          | 6.59        | 1.4           | 33.3        | Cardiac Arrest         |                                                             |
| 6     | C              | 78          | 23.9        | Rt         | F          | 6.67        | 0.9           | 33.1        | Breast Cancer          |                                                             |
| 7     | C              | 35          | 25.7        | Rt         | M          | 6.33        | 1.4           | 35.8        | Cardiopulmonary Arrest |                                                             |
|       | <b>Average</b> | <b>58.3</b> | <b>18.8</b> | <b>5/2</b> | <b>4/3</b> | <b>6.40</b> | <b>1.2</b>    | <b>32.4</b> |                        |                                                             |
| ..... |                |             |             |            |            |             |               |             |                        |                                                             |
| 8     | BD             | 80          | 11.6        | Lt         | F          | 6.51        | 1.0           | 47.1        | Stroke                 | Perphenazine, benztrapine                                   |
| 9     | BD             | 29          | 10.7        | Lt         | F          | 6.70        | 1.3           | 41.0        | Myocardial Infarct     | Lithium, clonazepam                                         |
| 10    | BD             | 38          | 22          | Rt         | M          | 6.24        | 1.3           | 46.5        | Cancer                 | Olanzapine, bupropion, divalproex, clonazepam               |
| 11    | BD             | 42          | 15.8        | Lt         | F          | 6.25        | 1.3           | 21.0        | Medication O.D.        | Perphenazine, divalproex, lithium                           |
| 12    | BD             | 52          | 17.2        | Lt         | F          | 6.05        | 0.5           | 11.6        | Renal Failure          | Haloperidol, olanzepine, lithium                            |
| 13    | BD             | 73          | 20.8        | Rt         | F          | 6.30        | 1.2           | 47.3        | Sepsis                 | Risperidone, carbamazepine                                  |
| 14    | BD             | 40          | 30.8        | Rt         | M          | 6.05        | 0.6           | 40.2        | Cardiopulmonary Arrest | Risperidone, quetiapine, citalopram, nefazodone, gabapentin |
|       | <b>Average</b> | <b>50.6</b> | <b>18.4</b> | <b>3/4</b> | <b>2/5</b> | <b>6.30</b> | <b>1.0</b>    | <b>36.4</b> |                        |                                                             |
| ..... |                |             |             |            |            |             |               |             |                        |                                                             |
| 15    | SZ             | 78          | 13.4        | Lt         | F          | 6.81        | 1.2           | 15.1        | Sinus Node Dis.        | Haloperidol, lithium                                        |
| 16    | SZ             | 26          | 16          | Rt         | M          | 6.75        | 1.6           | 24.4        | Suicide by Hanging     | Fluphenazine decanoate                                      |
| 17    | SZ             | 63          | 22.3        | Rt         | M          | 6.55        | 1.3           | 28.9        | Cardiac Arrest         | Clonazepam, haloperidol, lorazepam, trazodone               |
| 18    | SZ             | 72          | 21.7        | Rt         | F          | 6.65        | 0.7           | 31.6        | Cancer                 | Risperidone, paroxetine, benztrapine                        |
| 19    | SZ             | 46          | 18.5        | Lt         | M          | 6.31        | 1.0           | 28.3        | Sepsis                 | Haloperidol, olanzepine, divalproex                         |
| 20    | SZ             | 61          | 19.9        | Rt         | M          | 6.68        | 1.5           | 30.2        | Cardiopulmonary Arrest | Haloperidol, gabapentin                                     |
| 21    | SZ             | 42          | 27          | Rt         | M          | 6.62        | 1.2           | 32.7        | Cancer                 | Trifluoperazine                                             |
|       | <b>Average</b> | <b>55.4</b> | <b>19.8</b> | <b>5/2</b> | <b>4/3</b> | <b>6.62</b> | <b>1.2</b>    | <b>27.3</b> |                        |                                                             |

*There were 7 normal controls (C), 7 bipolar (BD) and 7 schizophrenic (SZ) subjects matched for age, postmortem interval (PMI), hemisphere, gender and pH on a group basis. One BD subject had a cerebrovascular accident (CVA), but this acute event did not affect the hippocampal formation. 18/28 refers to the 18S/28S ratio. %PC represents the Percent Present Calls for the CA2/3.*
