# Supplementary material
Source: PubMed Central journal article supplement (PMC1891259)
Supplement: pnas_0703806104_4.pdf [file pnas_0703806104_4.pdf]

**Table 4**

**Primer Pair Sequences for QRT-PCR Validation Studies**

---

|                         |           |                                  |                                                    |
|-------------------------|-----------|----------------------------------|----------------------------------------------------|
| <b>GAD<sub>67</sub></b> | M81883    | GAD67-3317F<br>GAD67-3544R       | TGCTCTTCTCTTACGCTCTCTGT<br>CACAGTGTGAATTTCCCTTCTTC |
| <b>LEF1</b>             | NM_016269 | LEF1-1429F<br>LEF1-1647R         | CCTCATCCAGCTATTGTAACACC<br>CTGGTTGATAGCTGCACTTTCTT |
| <b>HDAC1</b>            | NM_004964 | HDAC1-1747F<br>HDAC1-1949R       | AGGTCTGGGTGAAAGGGATACT<br>AGTGGGAAGGTACGAAAACAGA   |
| <b>PAX5</b>             | NM_016734 | PAX5-2209F<br>PAX5-2412R         | CTGCTCATCCCTCCTTCTTTAGT<br>GGAATCTCCCAGACAGTTTTCTT |
| <b>RUNX2</b>            | NM_004348 | DM-RUNX2-1010F<br>DM-RUNX2-1170R | TCTGGCCTTCCACTCTCAGT<br>GACTGGCGGGGTGTAAGTAA       |
| <b>B2M</b>              | NM_004048 | DM-B2M5-1<br>DM-B2M5-2           | GGCTATCCAGCGTACTCCAA<br>CGGCAGGCATACTCATCTTT       |

---
