# Supplementary material
Source: PubMed Central journal article supplement (PMC1891259)

# Network Associations of GAD67 Expression in Stratum Oriens of CA3/2

**A**

**SZ**

**BD**

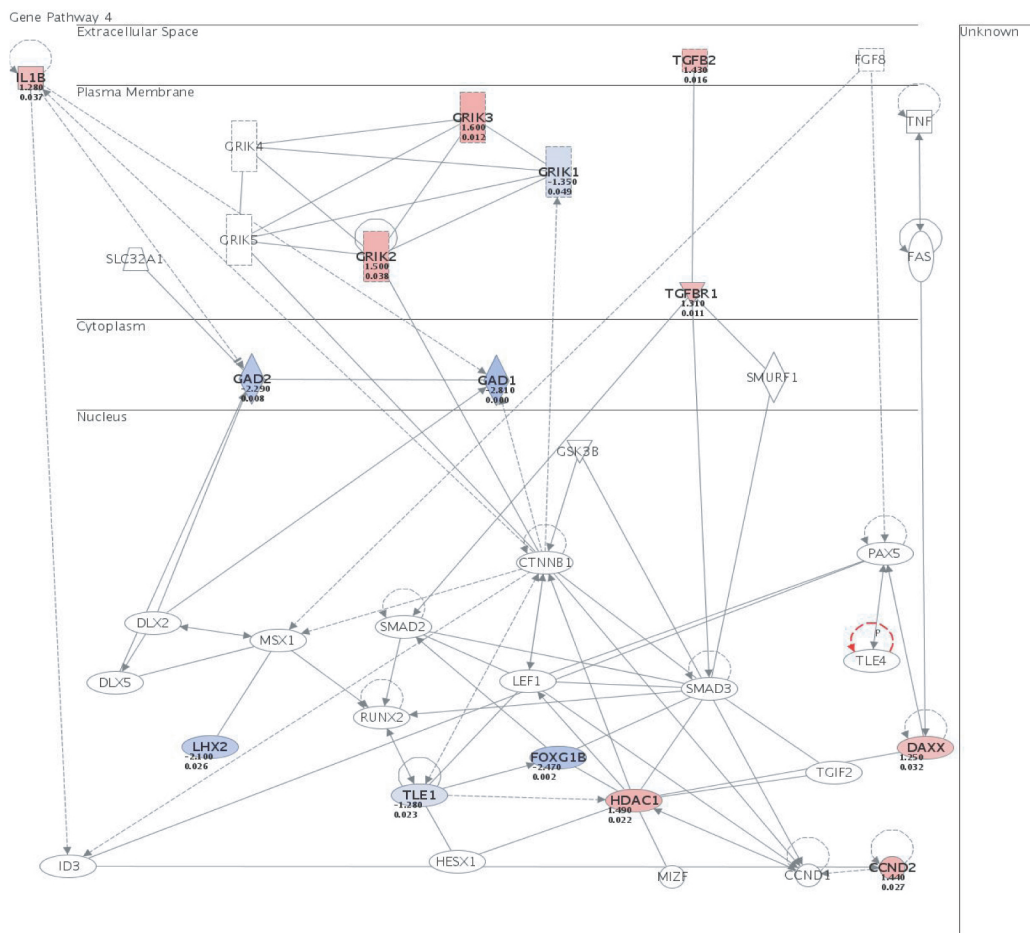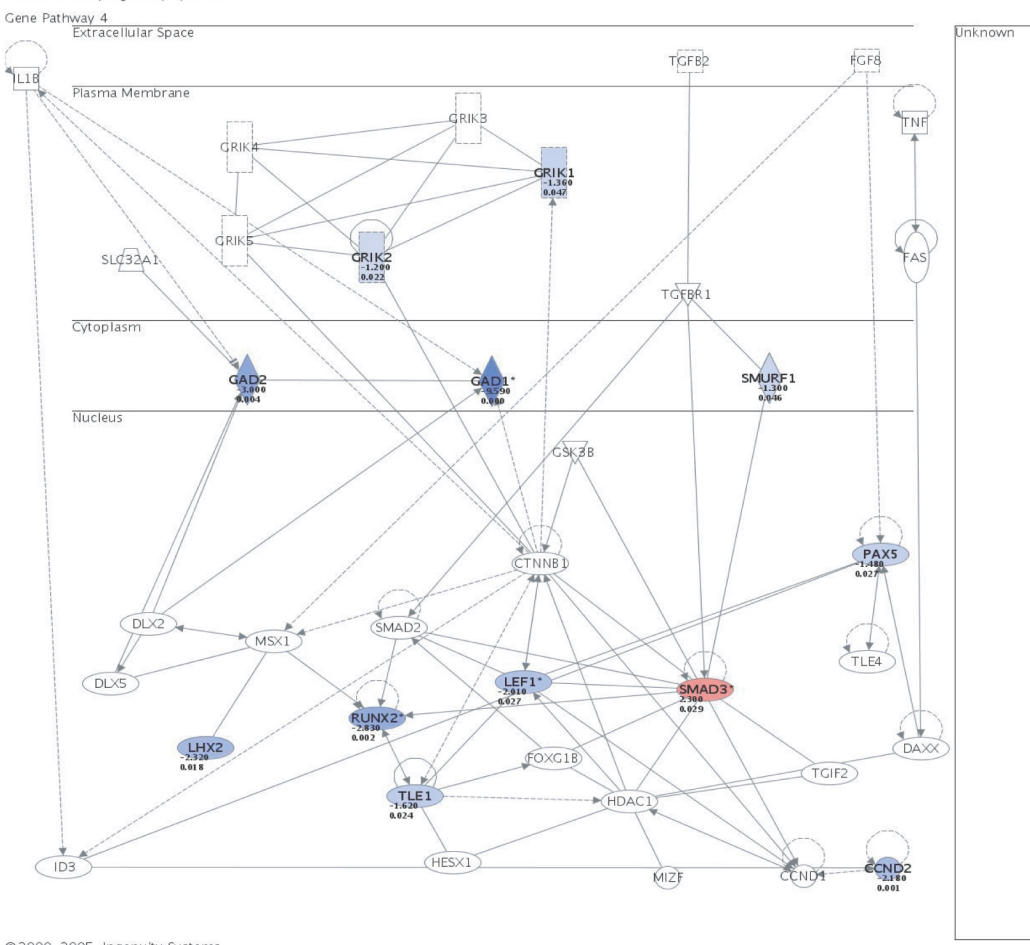

Unknown

Unknown

Supplement: pnas_0703806104_1.pdf [file pnas_0703806104_1.pdf]

# B Network Association Analysis of GAD67 Regulation in SZ and BD

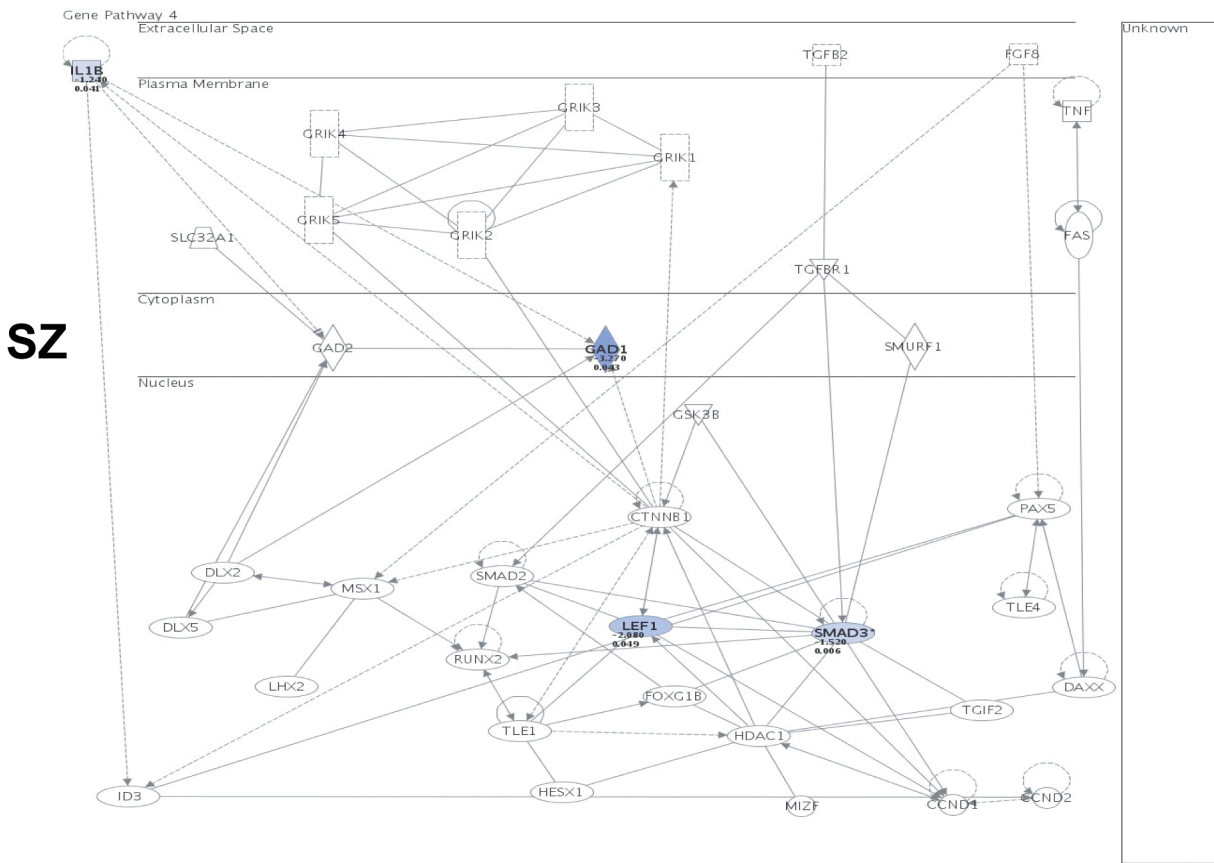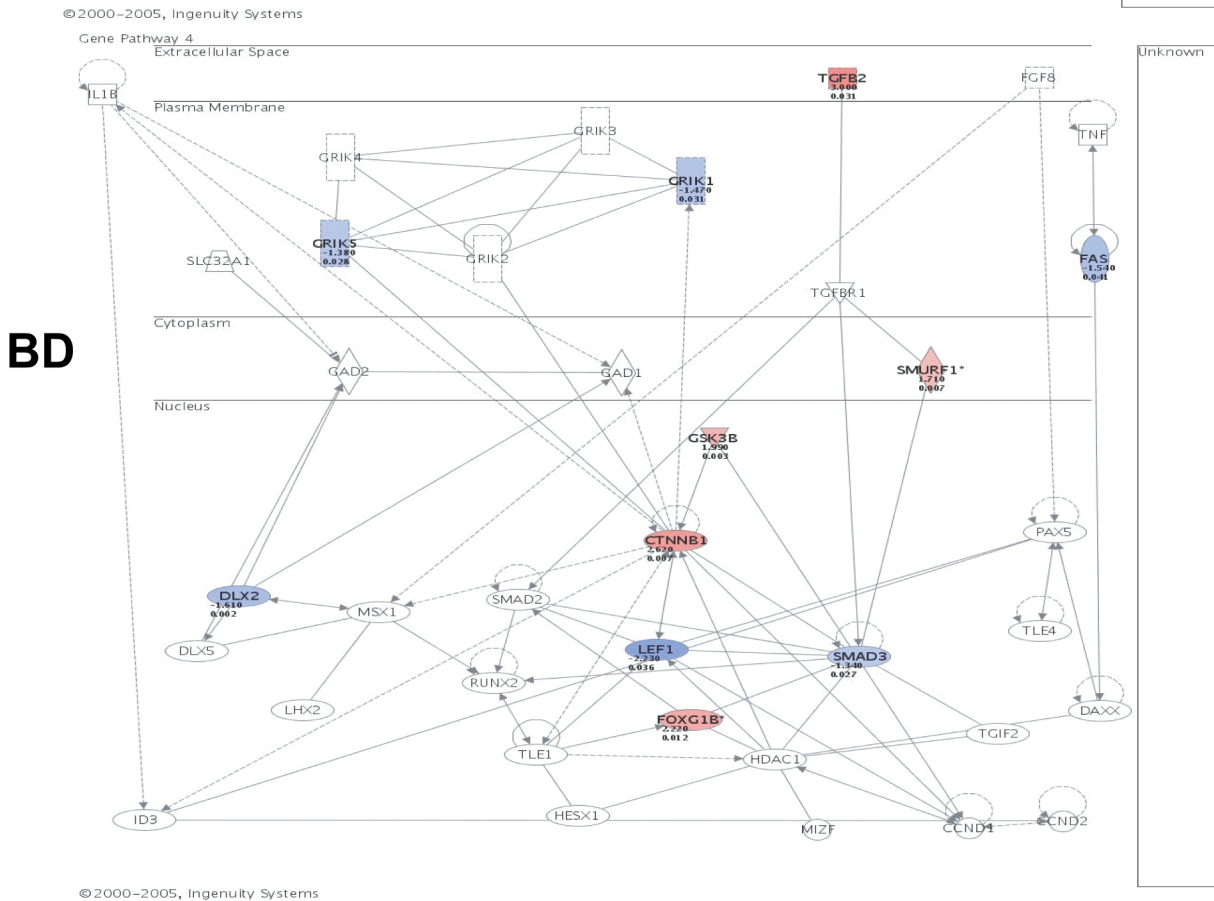

Supplement: pnas_0703806104_2.pdf [file pnas_0703806104_2.pdf]
